# Supplementary material for: Association between dietary Intake, eating behavior, and childhood obesity among children and adolescents in Ethiopia
Source: PubMed Central journal article supplement (PMC11009522; doi:10.1136/bmjnph-2021-000415), 2023-11-15
Supplement: bmjnph-2021-000415supp001.pdf [file bmjnph-2021-000415supp001.pdf]

**Annexure: Structured Questionnaire English Version Used for Data Collection****SECTION I- SOCIO-DEMOGRAPHIC CHARACTERISTICS**

| Sr.N | Questions and filters             | Coding categories                                                                                                                                    | Skip |
|------|-----------------------------------|------------------------------------------------------------------------------------------------------------------------------------------------------|------|
| 101  | Age of child                      | _____                                                                                                                                                |      |
| 102  | Child's sex                       | 1. Boy<br>2. Girl                                                                                                                                    |      |
| 103  | Sex of household head             | 1. Male<br>2. Female                                                                                                                                 |      |
| 104  | Age of household head             | _____                                                                                                                                                |      |
| 105  | Educational status of the mother  | 1. Unable to read and write<br>2. Read/write but no formal education.<br>3. If attended formal education; highest grade completed                    |      |
| 106  | Occupational status of the mother | 1. Farmer<br>2. Merchant<br>3. Governmental employee<br>4. Non-governmental employee<br>5. Daily laborer<br>6. Jobless<br>99. Others (specify) _____ |      |
| 107  | Marital status of the mother      | 1. Married<br>2. Divorced<br>3. Widowed<br>4. Separated                                                                                              |      |
| 108  | Does your household have:         | Yes No                                                                                                                                               |      |
|      | Electricity?                      | 1. Electricity? 1 2                                                                                                                                  |      |
|      | Radio?                            | 2. Radio? 1 2                                                                                                                                        |      |
|      | Television?                       | 3. Television? 1 2                                                                                                                                   |      |
|      | Telephone?                        | 4. Telephone? 1 2                                                                                                                                    |      |
|      | Personal computer?                | 5. Personal computer? 1 2                                                                                                                            |      |
|      | Internet?                         | 6. Internet? 1 2                                                                                                                                     |      |
|      | Refrigerator?                     | 7. Refrigerator? 1 2                                                                                                                                 |      |
|      | A table?                          | 8. A table? 1 2                                                                                                                                      |      |
|      | A chair?                          | 9. A chair? 1 2                                                                                                                                      |      |

| 109                      | Does any one of your household member own:                                                                     | <table style="width: 100%; border-collapse: collapse;"> <thead> <tr> <th style="width: 70%;"></th> <th style="width: 15%; text-align: center;">Yes</th> <th style="width: 15%; text-align: center;">No</th> </tr> </thead> <tbody> <tr> <td>1. A bajaji/motorcycle?</td> <td style="text-align: center;">1</td> <td style="text-align: center;">2</td> </tr> <tr> <td>2. An animal-drawn cart?</td> <td style="text-align: center;">1</td> <td style="text-align: center;">2</td> </tr> <tr> <td>3. A car/truck?</td> <td style="text-align: center;">1</td> <td style="text-align: center;">2</td> </tr> <tr> <td>4. A bicycle?</td> <td style="text-align: center;">1</td> <td style="text-align: center;">2</td> </tr> </tbody> </table> |  | Yes | No | 1. A bajaji/motorcycle? | 1 | 2 | 2. An animal-drawn cart? | 1 | 2 | 3. A car/truck? | 1 | 2 | 4. A bicycle? | 1 | 2 |  |
|--------------------------|----------------------------------------------------------------------------------------------------------------|---------------------------------------------------------------------------------------------------------------------------------------------------------------------------------------------------------------------------------------------------------------------------------------------------------------------------------------------------------------------------------------------------------------------------------------------------------------------------------------------------------------------------------------------------------------------------------------------------------------------------------------------------------------------------------------------------------------------------------------------|--|-----|----|-------------------------|---|---|--------------------------|---|---|-----------------|---|---|---------------|---|---|--|
|                          | Yes                                                                                                            | No                                                                                                                                                                                                                                                                                                                                                                                                                                                                                                                                                                                                                                                                                                                                          |  |     |    |                         |   |   |                          |   |   |                 |   |   |               |   |   |  |
| 1. A bajaji/motorcycle?  | 1                                                                                                              | 2                                                                                                                                                                                                                                                                                                                                                                                                                                                                                                                                                                                                                                                                                                                                           |  |     |    |                         |   |   |                          |   |   |                 |   |   |               |   |   |  |
| 2. An animal-drawn cart? | 1                                                                                                              | 2                                                                                                                                                                                                                                                                                                                                                                                                                                                                                                                                                                                                                                                                                                                                           |  |     |    |                         |   |   |                          |   |   |                 |   |   |               |   |   |  |
| 3. A car/truck?          | 1                                                                                                              | 2                                                                                                                                                                                                                                                                                                                                                                                                                                                                                                                                                                                                                                                                                                                                           |  |     |    |                         |   |   |                          |   |   |                 |   |   |               |   |   |  |
| 4. A bicycle?            | 1                                                                                                              | 2                                                                                                                                                                                                                                                                                                                                                                                                                                                                                                                                                                                                                                                                                                                                           |  |     |    |                         |   |   |                          |   |   |                 |   |   |               |   |   |  |
| 110                      | How many rooms in this household are used for sleeping?                                                        | ROOMS _____                                                                                                                                                                                                                                                                                                                                                                                                                                                                                                                                                                                                                                                                                                                                 |  |     |    |                         |   |   |                          |   |   |                 |   |   |               |   |   |  |
| 111                      | Main material of the floor(observe)<br>[Finished-polished wood, asphalt, ceramic, cement & carpet]             | 1. Natural (earth/sand)<br>2. Rudimentary (wood/bamboo)<br>3. Finished floor<br>99. Other (specify)                                                                                                                                                                                                                                                                                                                                                                                                                                                                                                                                                                                                                                         |  |     |    |                         |   |   |                          |   |   |                 |   |   |               |   |   |  |
| 112                      | Main material of the roof (observe)<br>[Finished roofing-corrugated iron/metal, wood, cement, concrete]        | 1. Natural roofing (no roof/leaf)<br>2. Rudimentary (plastic/bamboo/wood)<br>3. Finished roofing<br>99. Other (specify)_____                                                                                                                                                                                                                                                                                                                                                                                                                                                                                                                                                                                                                |  |     |    |                         |   |   |                          |   |   |                 |   |   |               |   |   |  |
| 113                      | Main material of the exterior wall (observe)<br>[Natural wall- if no wall, or cane/trunks/bamboo/reed or dirt] | 1. Natural wall (no wall/reeds/dirt)<br>2. Rudimentary wall<br>3. Finished wall<br>99. Other (specify) _____                                                                                                                                                                                                                                                                                                                                                                                                                                                                                                                                                                                                                                |  |     |    |                         |   |   |                          |   |   |                 |   |   |               |   |   |  |
| 114                      | What is the main source of drinking water for your household?                                                  | 1. Tap water (piped into house or yard)<br>2. Protected dug well/spring/rain water<br>3. Public tap<br>99. Other (specify) _____                                                                                                                                                                                                                                                                                                                                                                                                                                                                                                                                                                                                            |  |     |    |                         |   |   |                          |   |   |                 |   |   |               |   |   |  |
| 115                      | What kinds of toilet facility do members of your household use?                                                | 1. Pour flush latrine (private or shared)<br>2. Pit latrine (private or shared)<br>3. Public toilet<br>99. Other (specify)_____                                                                                                                                                                                                                                                                                                                                                                                                                                                                                                                                                                                                             |  |     |    |                         |   |   |                          |   |   |                 |   |   |               |   |   |  |
| 116                      | Does any member of this household have a bank or microfinance saving account?                                  | 1. Yes<br>2. No                                                                                                                                                                                                                                                                                                                                                                                                                                                                                                                                                                                                                                                                                                                             |  |     |    |                         |   |   |                          |   |   |                 |   |   |               |   |   |  |

### SECTION II- dietary diversity

Now I would like to ask you about the types of foods that you ate yesterday during the day and at night/ During the previous 24-hour period (The time from this time yesterday until now) did you consumed any of the following food types:

| <b>Interviewer:</b> Mark "Yes" if the respondent eats even one of the listed food examples. |                                      |                                                                                                                                                            |                 |
|---------------------------------------------------------------------------------------------|--------------------------------------|------------------------------------------------------------------------------------------------------------------------------------------------------------|-----------------|
| Sr.N                                                                                        | Food group                           | Examples                                                                                                                                                   | Response        |
| 201                                                                                         | Cereals                              | Bread, 'ambasha', rice noodles, biscuits, cookies, or any other foods made from millet, sorghum, maize, rice, wheat,                                       | 1. YES<br>2. NO |
| 202                                                                                         | White tubers and roots               | White potatoes, white yams, cassava, or foods made from roots.                                                                                             | 1. YES<br>2. NO |
| 203                                                                                         | Vitamin A rich vegetables and tubers | Pumpkin, carrot, squash, or sweet potato that are orange inside + other locally available vitamin A rich vegetables (e.g. red sweet pepper)                | 1. YES<br>2. NO |
| 204                                                                                         | Dark green leafy vegetables          | Any dark, green, leafy vegetables such as bean leaves, kale, spinach, Sweet pepper, pepper leaves, taro leaves, and amaranth leaves including wild ones.   | 1. YES<br>2. NO |
| 205                                                                                         | Other vegetables                     | Any other vegetables (e.g. tomato, onion, eggplant) including wild vegetables + other locally available vegetables                                         | 1. YES<br>2. NO |
| 206                                                                                         | Vitamin A rich fruits                | Ripe, mangoes, orange, papayas apricot (fresh or dried), dried peach, and 100% fruit juice made from these + other locally available vitamin A rich fruits | 1. YES<br>2. NO |
| 207                                                                                         | Other fruits                         | Any other fruits, including wild fruits and 100% fruit juice made from these                                                                               | 1. YES<br>2. NO |
| 208                                                                                         | Organ meat (iron-rich)               | liver, kidney, heart or other organ meats or blood-based foods                                                                                             | 1. YES<br>2. NO |
| 209                                                                                         | Flesh meat products                  | Beef, pork, lamb, goat, rabbit, wild game, chicken, duck, or other birds, insects                                                                          | 1. YES<br>2. NO |
| 210                                                                                         | Eggs                                 | Any eggs? eggs from chicken, duck, guinea fowl or any other egg                                                                                            | 1. YES<br>2. NO |
| 211                                                                                         | Fish                                 | Any fresh or dried fish or shellfish?                                                                                                                      | 1. YES<br>2. NO |
| 212                                                                                         | Legumes, nuts and seeds              | Any beans, peas, lentils, nuts, seeds or foods made from these(eg. hummus, peanut butter)                                                                  | 1. YES<br>2. NO |
| 213                                                                                         | Milk and milk products               | Any cheese, yogurt, milk or other milk products?                                                                                                           | 1. YES<br>2. NO |
| 214                                                                                         | Oils and fats                        | Any foods made with oil, fat, or butter added to food or used for cooking?                                                                                 | 1. YES<br>2. NO |
| 215                                                                                         | sweets                               | Any sugar, honey, sweetened soda or sweetened juice drinks, sugary foods such as chocolates, candies, cookies and cakes                                    | 1. YES<br>2. NO |
| 216                                                                                         | spices, condiments, beverages        | spices (black pepper, salt), condiments (soy sauce, hot sauce), coffee, tea, alcoholic                                                                     | 1. YES<br>2. NO |

|     |                      |                                                                                              |                 |
|-----|----------------------|----------------------------------------------------------------------------------------------|-----------------|
|     |                      | beverages                                                                                    |                 |
| 217 | Household level only | Did you or anyone in your household eat anything (meal or snack) OUTSIDE the home yesterday? | 1. YES<br>2. NO |
| 218 | Individual level     | Did you eat anything (meal or snack) OUTSIDE the home yesterday?                             | 1. YES<br>2. NO |

### SECTION III- Child Dietary Pattern and Habits

| Sr.N | Questions and filters                                                   | Coding categories                                                                                                          | Skip |
|------|-------------------------------------------------------------------------|----------------------------------------------------------------------------------------------------------------------------|------|
| 301  | List three foods that you usually eat                                   | 1.....<br>2.....<br>3.....                                                                                                 |      |
| 302  | List three foods that you do not usually eat                            | 1.....<br>2.....<br>3.....                                                                                                 |      |
| 303  | How many days per week did you usually eat fruit such as orange, banana | 1.No intake<br>2.One day<br>3.Two days and above                                                                           |      |
| 304  | How many days per week did you usually eat vegetables?                  | 1.No intake<br>2.One day<br>3.Two days<br>4.Three days and above                                                           |      |
| 305  | Do you have a snack currently?                                          | 1.Yes<br>2.No, if no go to Q409                                                                                            |      |
| 306  | If your answer is yes, what do you have for snack?                      | .....                                                                                                                      |      |
| 307  | How many times a day do you have snack?                                 | 1.One times<br>2.Two times<br>3.Three times and above                                                                      |      |
| 308  | How often do you serve meals per day other than snack?                  | 1.One times<br>2.Two times<br>3.Three times<br>4.Four and above                                                            |      |
| 309  | How do you get your lunch?                                              | 1-Bring from home<br>2-Buy from school cafeteria<br>3-Buy from nearby food service establishment.<br>4-I did not use lunch |      |
| 310  | List foods that you usually bought in addition to the regular meal      | 1-cake<br>2-biscuit<br>3-ice cream<br>4-chocolate<br>99-others (specify).....                                              |      |

|     |                                                               |                                                                                       |  |
|-----|---------------------------------------------------------------|---------------------------------------------------------------------------------------|--|
| 311 | Do you eat when you watch television/movies?                  | 1-yes<br>2-no<br>3- I didn't not watch television/movies                              |  |
| 312 | Do you eat food when you study?                               | 1-Yes<br>2- No                                                                        |  |
| 313 | How often do you drink soft drinks like Coca, Pepsi per week? | 1- I do not drink<br>2-One times<br>3-Two times<br>4-Three times<br>5- Four and above |  |
| 314 | Child eats in school                                          | 1-Yes<br>2- No                                                                        |  |
| 315 | Child carries packed lunch                                    | 1-Yes<br>2- No                                                                        |  |
| 316 | Child buys snacks                                             | 1-Yes<br>2- No                                                                        |  |

#### SECTION IV- Physical Measurements

| Anthropometric measurements of the child |                       |                   |      |
|------------------------------------------|-----------------------|-------------------|------|
| Sr.N                                     | Questions and filters | Coding categories | skip |
| 401                                      | Height of the child   | _____cm           |      |
| 402                                      | Weight of the child   | _____kg           |      |
